# Supplementary material for: Lateral flow assay-based detection of nuclear fusion oncoprotein: implications for screening of acute promyelocytic leukemia
Source: Royal Society of Chemistry journal article supplement (doi:10.1039/d4sd00357h), 2025-01-01
Supplement: d4sd00357h1.xlsx [file d4sd00357h1.xlsx]

## Sheet: Fig 2
WBC separation
	density gradient centrifugation	WBC filter	magentic immunoseparation
	Recovery	Recovery	Recovery*
Sample 1	0.3351	1	0.625
Sample 2	0.5043	1	0.2581
Sample 3	0.3616	1	0.2
Sample 4	0.8372	1	0.2917
Sample 5	0.6667	0.8796	0.3611
average	0.54098	0.97592	0.34718
stdev	0.189452	0.04816	0.14836

## Sheet: Fig 3 a
lysis buffer comparison _ abs @ 562 nm
lysis buffer	background absorbance				NB4 lysate absorbance				Average Background	stdev		Average NB4 lysate	stdev
RIPA-T	0.1123	0.1124	0.1137		0.4777	0.4344	0.4968		0.1128	0.000637704		0.469633	0.0261055
RIPA-CS	0.1167	0.1177	0.1258		0.4226	0.3835	0.4486		0.120067	0.00407458		0.418233	0.0267557
cell lysis buffer	0.1238	0.125	0.1261		0.4169	0.3796	0.4421		0.124967	0.000939267		0.412867	0.0256744
M-PER	0.0985	0.0979	0.0986		0.3186	0.2848	0.3312		0.0983333	0.000309121		0.311533	0.0195907
1X PBS	0.0832	0.0816	0.0819		0.1009	0.1052	0.1027		0.0822333	0.000694421		0.102933	0.0017632
	NB4-Background
lysis buffer	average	stdev
RIPA-T	0.356833	0.0260977
RIPA-CS	0.298167	0.0264437
cell lysis buffer	0.2879	0.0256572
M-PER	0.2132	0.0195883
1X PBS	0.0207	0.0016207

## Sheet: Fig 3 b
lysis buffer comparison _ abs @ 450 nm
lysis buffer	background absorbance				NB4 lysate absorbance				Average NB4 lysate	stdev
RIPA-T		0.0506			1.7304	1.9185	1.8916		1.84683	0.08306
RIPA-CS		0.0499			0.1189	0.1182	0.1541		0.1304	0.0167609
cell lysis buffer		0.0505			0.0514	0.0511	0.0532		0.0519	0.000927361
M-PER		0.0531			0.0663	0.073	0.0876		0.0756333	0.00889282
1X PBS		0.0505			0.2451	0.1939	0.2084		0.2158	0.0215473
	NB4-Background
lysis buffer	average	stdev
RIPA-T	1.79623	0.08306
RIPA-CS	0.0805	0.0167609
cell lysis buffer	0.0014	0.000927361
M-PER	0.0225333	0.00889282
1X PBS	0.1653	0.0215473

## Sheet: fig 3c
lysis buffer comparison on LFA
lysis buffer	TL signal	CL signal	TL/CL
RIPA-T	834	5563	0.149919			TL/CL
	902	5737	0.157225		lysis buffer	Average	Stdev
	805	6277	0.128246		RIPA-T	0.14513	0.0123058
RIPA-CS	742	6793	0.10923		RIPA-CS	0.0999854	0.0177403
	457	6080	0.0751645		cell lysis buffer	0.112806	0.00879038
	779	6741	0.115561		M-PER	0.115227	0.0575879
cell lysis buffer	576	4641	0.124111		1X PBS	0.000185512	0.000262353
	472	4597	0.102676
	549	4918	0.111631
M-PER	580	5607	0.103442
	600	5361	0.111919
	631	4842	0.130318
1X PBS	0	8625	0
	0	8120	0
	6	10781	0.000556535

## Sheet: Fig 4
	Negative U937 lysate
	particles	RARa7			RARa2			RARa1			PML5			PML2			PML1			Fusion1
strips	TL	CL	TL/CL	TL	CL	TL/CL	TL	CL	TL/CL	TL	CL	TL/CL	TL	CL	TL/CL	TL	CL	TL/CL	TL	CL	TL/CL
Fusion1	223	23784	0.00937605	669	53207	0.0125735	315	27844	0.011313	490	51645	0.00948785	418	44552	0.00938229	387	36533	0.0105932	2832	49981	0.0566615
RARa3	149	45923	0.00324456	391	52497	0.00744804	260	26735	0.00972508	587	51276	0.0114479	348	42520	0.00818438	137	31504	0.00434865	146	53070	0.00275108
RARa4	49	4288	0.0114272	310	49668	0.00624144	154	27044	0.00569442	1670	48728	0.0342719	355	44027	0.00806323	194	34128	0.00568448	111	27363	0.00405657
RARa5	105	10097	0.0103991	129	51887	0.00248617	129	25030	0.00515382	108	50159	0.00215315	137	43768	0.00313014	62	29822	0.002079	132	27851	0.00473951
PML3	107	18964	0.00564227	131	51237	0.00255675	175	27849	0.00628389	243	51292	0.00473758	152	42211	0.00360096	89	33284	0.00267396	217	48600	0.00446502
PML4	37	17019	0.00217404	207	51350	0.00403116	163	24118	0.00675844	221	50209	0.0044016	119	43440	0.00273941	69	33353	0.00206878	216	40303	0.0053594
RARa6	52	36502	0.00142458	285	51654	0.00551748	68	22395	0.00303639	162	51074	0.00317187	17	42242	0.000402443	76	25877	0.00293697	104	53725	0.00193578
PML6	88	53830	0.00163478	231	51983	0.00444376	66	23307	0.00283177	289	53103	0.00544225	0	39515	0	91	27442	0.00331608	136	57241	0.00237592
Fusion2	0	23747	0	2104	51656	0.040731	228	23313	0.00977995	2274	49984	0.0454946	234	42740	0.00547497	146	31118	0.00469182	174	50359	0.00345519
RARa8	0	52978	0	0	54108	0	372	29136	0.0127677	0	53708	0	460	46219	0.00995262	0	37566	0	68	55669	0.00122151
PML1				408	56215	0.00725785	171	32145	0.00531965				435	55209	0.00787915				303	57778	0.00524421
PML2				242	56573	0.00427766	297	26710	0.0111194							503	48280	0.0104184	237	58672	0.00403941
RARa1				557	53968	0.0103209							409	53559	0.00763644	693	40299	0.0171965	0	59929	0
RARa2							195	15006	0.0129948				340	54219	0.00627086	262	19935	0.0131427	4	57488	6.95796e-05
	APL positive NB4 lysate
	particles	RARa7			RARa2			RARa1			PML5			PML2			PML1			Fusion1
strips	TL	CL	TL/CL	TL	CL	TL/CL	TL	CL	TL/CL	TL	CL	TL/CL	TL	CL	TL/CL	TL	CL	TL/CL	TL	CL	TL/CL
Fusion1	860	21080	0.040797	1155	51292	0.0225181	939	29971	0.0313303	1297	52082	0.024903	1160	43289	0.0267966	1254	35184	0.0356412	3518	47309	0.0743622
RARa3	946	44875	0.0210808	1289	52805	0.0244106	1167	22318	0.0522896	1334	51278	0.0260151	1356	43082	0.0314749	1271	28077	0.0452684	629	52107	0.0120713
RARa4	176	4415	0.0398641	395	49970	0.00790474	267	25391	0.0105155	310	47382	0.00654257	545	44048	0.0123729	242	29555	0.00818812	355	23150	0.0153348
RARa5	342	6222	0.0549662	379	49449	0.00766446	375	26324	0.0142456	413	45573	0.00906238	438	44280	0.0098916	392	26119	0.0150082	337	30119	0.011189
PML3	383	27949	0.0137035	561	49827	0.011259	405	24513	0.0165218	499	51608	0.00966904	382	43765	0.00872844	318	32687	0.00972864	317	40987	0.00773416
PML4	550	13202	0.0416604	455	49453	0.00920065	731	26634	0.0274461	808	48523	0.0166519	777	44503	0.0174595	872	27494	0.031716	411	33633	0.0122201
RARa6	368	40365	0.00911681	681	51402	0.0132485	434	23730	0.0182891	515	50725	0.0101528	512	40141	0.012755	510	23955	0.0212899	358	52270	0.00684905
PML6	328	53015	0.00618693	435	51551	0.00843825	348	22310	0.0155984	475	53018	0.00895922	394	39336	0.0100163	457	24798	0.0184289	373	56570	0.0065936
Fusion2	378	24554	0.0153946	839	51352	0.0163382	432	23140	0.018669	870	49539	0.0175619	683	41364	0.0165119	802	26254	0.0305477	331	48919	0.00676629
RARA8	0	52761	0	243	53071	0.00457877	0	32632	0	269	52969	0.00507844	174	44686	0.00389384	344	32313	0.0106459	341	55064	0.00619279
PML1				1203	53811	0.022356	848	39785	0.0213146				1021	54848	0.0186151				188	58759	0.00319951
PML2				2179	53845	0.040468	968	31040	0.0311856							1708	44069	0.0387574	371	60417	0.00614066
RARa1				2591	54718	0.0473519							2355	54580	0.0431477	2496	40283	0.0619616	600	58536	0.0102501
RARa2							829	15072	0.0550027				1149	52993	0.0216821	820	19710	0.0416032	215	56487	0.00380619
	TL NB4-TL U937 (Figure 4)
	particles	RARa7			RARa2			RARa1			PML5			PML2			PML1			Fusion1
strips
Fusion1	637			486			624			807			742			867			686
RARa3	797			898			907			747			1008			1134			483
RARa4	127			85			113			-1360			190			48			244
RARa5	237			250			246			305			301			330			205
PML3	276			430			230			256			230			229			100
PML4	513			248			568			587			658			803			195
RARa6	316			396			366			353			495			434			254
PML6	240			204			282			186			394			366			237
Fusion2	378			-1265			204			-1404			449			656			157
RARA8	0			243			-372			269			-286			344			273
PML1				795			677						586						-115
PML2				1937			671									1205			134
RARa1				2034									1946			1803			600
RARa2							634						809			558			211

## Sheet: Fig 5
%NB4 in PBMC
	TL signal	CL signal	TL/CL
0	803	97471	0.00823835
	810	95320	0.00849769
	826	95294	0.00866791
							TL/CL
0.05	1430	98400	0.0145325			%NB4	Average	Stdev	cutoff
	606	90321	0.0067094			0	0.00846798	0.000176622	0.0142741
	1185	92676	0.0127865			0.05	0.0113428	0.00335295	0.0142741
						0.1	0.012821	0.000908513	0.0142741
0.1	1365	97777	0.0139603			0.2	0.0263355	0.00217367	0.0142741
	1052	89631	0.011737			0.4	0.0637811	0.0175504	0.0142741
	1155	90477	0.0127657			0.6	0.0834997	0.00963263	0.0142741
						0.8	0.129939	0.0158115	0.0142741
0.2	2211	90197	0.024513			1	0.195031	0.0204107	0.0142741
	2379	94770	0.0251029
	2453	83462	0.0293906
0.4	4097	88454	0.0463179			cutoff=	0.0142741	LOD (%) =	11.0837
	7663	87291	0.0877868			background +1.645*background sigma+1.645*lowest positive point sigma
	5179	90481	0.0572385
0.6	7284	93605	0.0778164
	6698	88575	0.0756195
	8996	92682	0.0970631
0.8	10109	93573	0.108033
	11813	86223	0.137005
	12291	84895	0.144779
1	16225	94258	0.172134
	20555	92715	0.221701
	15890	83081	0.191259

## Sheet: Fig 6
NB4 in HL60
	TL signal	CL signal	TL/CL
0	896	36248	0.0247186
	998	32170	0.0310227
	796	31647	0.0251525					TL/CL
							%NB4	Average	Stdev	cutoff
0.1	1083	32558	0.0332637				0	0.0269646	0.00287497	0.0329884
	1162	33146	0.035057				0.1	0.0343644	0.000786925	0.0329884
	1014	29161	0.0347725				0.2	0.0461314	0.00344673	0.0329884
							0.4	0.0721019	0.00747471	0.0329884
0.2	1353	31349	0.0431593				0.6	0.0805843	0.0199927	0.0329884
	1298	29319	0.0442716				0.8	0.115445	0.00671614	0.0329884
	1640	32180	0.0509633				1	0.169449	0.0231922	0.0329884
0.4	1906	28094	0.0678437
	2408	29149	0.08261
	1924	29217	0.0658521
0.6	2344	42434	0.0552387				cutoff=	0.0329884	LOD (%) =	8.09245
	2508	30435	0.0824051				background +1.645*background sigma+1.645*lowest positive point sigma
	3081	29594	0.104109
0.8	3241	30372	0.10671
	2906	24927	0.11658
	3592	29193	0.123043
1	5312	26671	0.199168
	4573	32075	0.142572
	5136	30827	0.166607

## Sheet: Fig 7
Specificity
	TL signal	CL signal	TL/CL			TL/CL
HL60	364	60732	0.00599355			Average	Stdev
	398	65992	0.00603103		HL60	0.00577061	0.000342127
	276	52201	0.00528726		U937	0.00532326	0.00120643
					JeKo-1	0.0230035	0.00849249
U937	319	50533	0.00631271		KBM7	0.021571	0.00218909
	316	52385	0.00603226		SUP-B15	0.0100036	0.00266312
	219	60417	0.00362481		NB4	0.302393	0.0577836
					PB	0.0179959	0.00396656
JeKo-1	734	51347	0.0142949		BM	0.00758016	0.00564005
	1232	61005	0.0201951
	1706	49420	0.0345204
KBM7	1076	49347	0.0218048
	1640	67972	0.0241276
	890	47389	0.0187807
SUP-B15	410	50580	0.00810597
	426	52366	0.00813505
	631	45825	0.0137698
NB4	10344	43673	0.236851
	13907	47481	0.292896
	14082	37310	0.377432
PB	828	38760	0.0213622
	775	36309	0.0213446
	400	35181	0.0113698
	483	31201	0.0154803
	727	35598	0.0204225
BM	510	34031	0.0149863
	97	33430	0.00290159
	116	31222	0.00371533
	88	35852	0.00245454
	62	32998	0.0018789
	164	21454	0.00764426
	310	20283	0.0152837
	330	21480	0.0153631
	33	21777	0.00151536
	145	33219	0.00436497
	483	36388	0.0132736
